# Supplementary material
Source: HighWire-hosted journal article supplement (https://www.cmaj.ca/content/suppl/2023/01/24/195.4.E143)
Supplement: 221068-res-1-at.pdf [file 221068-res-1-at.pdf]

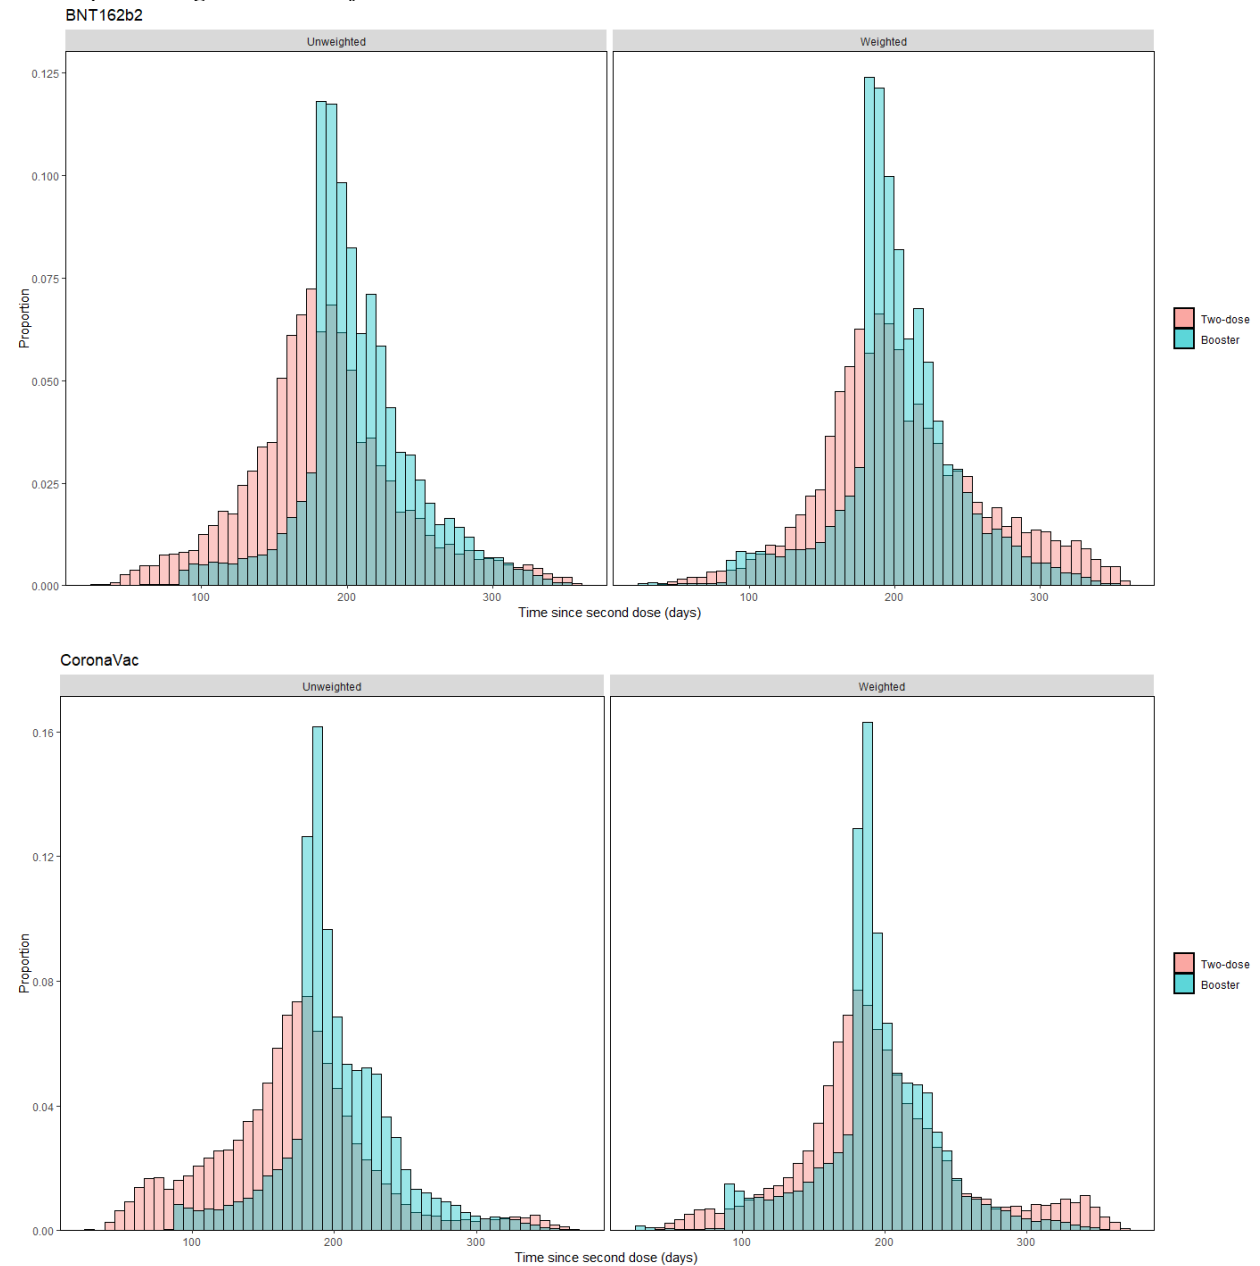

Supplementary Figure 1. Weighted and unweighted distribution of time from second dose vaccination for the two vaccine groups, with and without booster vaccination respectively

BNT162b2 cumulative incidence plot, unweighted

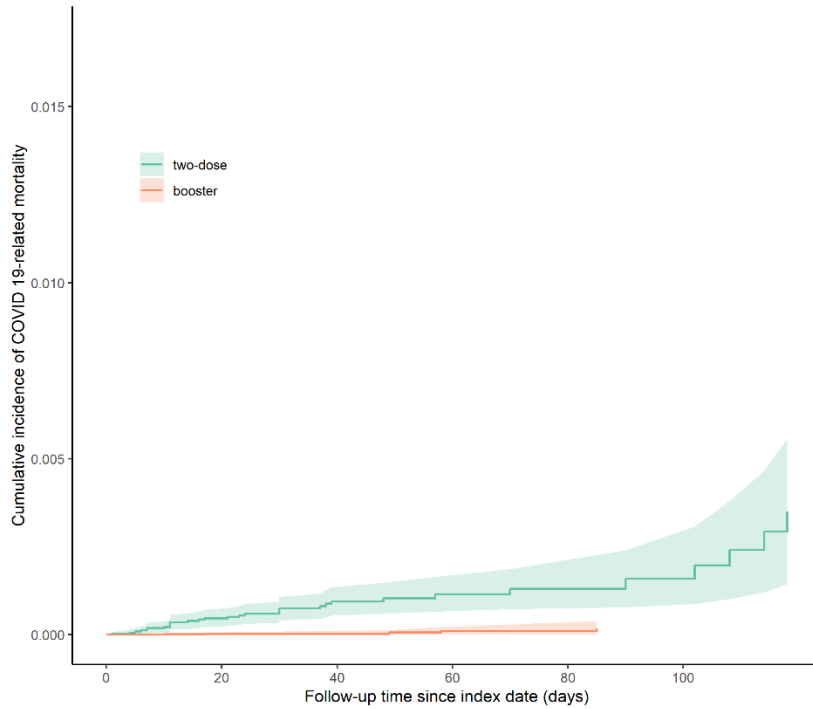

|          |                 |       |       |       |       |      |
|----------|-----------------|-------|-------|-------|-------|------|
| two-dose | 33435           | 25229 | 14176 | 8533  | 4970  | 2680 |
| booster  | 87289           | 66322 | 37104 | 22840 | 13728 | 7745 |
|          | Numbers at risk |       |       |       |       |      |

CoronaVac cumulative incidence plot, unweighted

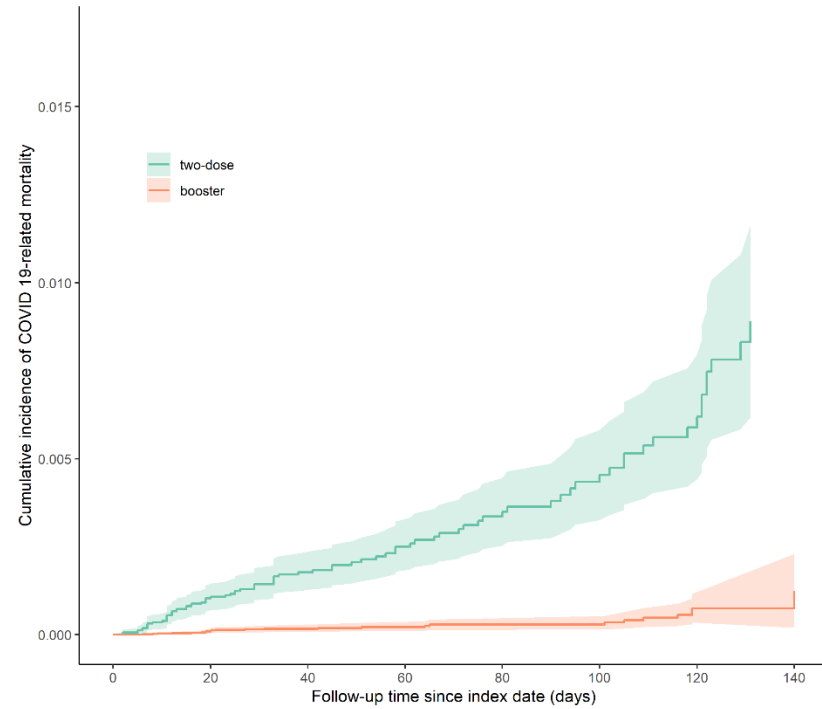

|          |                 |       |       |       |       |       |       |      |
|----------|-----------------|-------|-------|-------|-------|-------|-------|------|
| two-dose | 32341           | 25422 | 15696 | 10787 | 7415  | 5099  | 3287  | 610  |
| booster  | 94977           | 75007 | 45789 | 32080 | 22658 | 16032 | 10493 | 2022 |
|          | Numbers at risk |       |       |       |       |       |       |      |

Supplementary Figure 2. Unweighted cumulative incidence of COVID-19-related mortality with 95% confidence interval represented by shaded area. The index date is operationalized as the date of booster vaccination or the matched pseudo index date for the two-dose vaccinated.

Supplementary Table 1. Diagnostic codes used to operationalize chronic conditions and multimorbidity

| Chronic conditions                                                    | International Classification of Diseases, Ninth Revision                                                                                                                                                                                  | International Classification of Primary Care                         |
|-----------------------------------------------------------------------|-------------------------------------------------------------------------------------------------------------------------------------------------------------------------------------------------------------------------------------------|----------------------------------------------------------------------|
| Alcohol misuse                                                        | 265.2, 291.1–291.3, 291.5–291.9, 303.0, 303.9, 305.0, 357.5, 425.5, 535.3, 571.0–571.3, 980, V11.3                                                                                                                                        | P15                                                                  |
| Asthma                                                                | 493                                                                                                                                                                                                                                       | R96                                                                  |
| Atrial fibrillation                                                   | 427.3                                                                                                                                                                                                                                     | K78                                                                  |
| Cancer, lymphoma                                                      | 200–202, 203.0, 238.6                                                                                                                                                                                                                     | B72                                                                  |
| Cancer, metastatic                                                    | 196–199                                                                                                                                                                                                                                   | B74, D74, D76, D77, L71, N74, S77, T71, U75, U76, U77, W72, X77, Y78 |
| Cancer, non-metastatic (breast, cervical, colorectal, lung, prostate) | 153-154, 162-163, 174, 180, 185, 230.3-230.6, 231.2, 233.0-233.1, 233.4                                                                                                                                                                   | D75, R84, X75, X76, Y77                                              |
| Chronic heart failure                                                 | 398.91, 402.01, 402.11, 402.91, 404.01, 404.03, 404.11, 404.13, 404.91, 404.93, 425.4–425.9, 428                                                                                                                                          | K77                                                                  |
| Chronic kidney disease                                                | 583, 584, 585, 586, 592, 593.9                                                                                                                                                                                                            | U14                                                                  |
| Chronic pain                                                          | 307.80, 307.89, 338.0, 338.2, 338.4, 719.41, 719.45 - 719.47, 719.49, 720.0, 720.2, 720.9, 721.0 - 721.4, 721.6, 721.8, 721.9, 722, 723.0, 723.1, 723.3 - 723.9, 724.0 - 724.6, 724.70, 724.79, 724.8, 724.9, 729.0 - 729.2, 729.4, 729.5 | A01                                                                  |
| Chronic pulmonary disease                                             | 416.8, 416.9, 490–492, 494-505, 506.4, 508.1, 508.8                                                                                                                                                                                       | R95                                                                  |
| Chronic viral hepatitis B                                             | 70.2-70.3                                                                                                                                                                                                                                 | D72                                                                  |
| Cirrhosis                                                             | 571.2, 571.5, 571.6, 456.0, 456.1, 456.20, 456.21, 567.0, 567.2, 567.21, 567.29, 567.8, 567.9, 572.2, 572.4, 789.5 (Exclude 567.81, 567.82, 789.51)                                                                                       | -                                                                    |
| Dementia                                                              | 290, 294.1, 331.2                                                                                                                                                                                                                         | P70                                                                  |
| Depression                                                            | 296.2, 296.3, 296.5, 300.4, 309, 311                                                                                                                                                                                                      | P76                                                                  |
| Diabetes                                                              | 250                                                                                                                                                                                                                                       | T89-T90                                                              |
| Epilepsy                                                              | 345                                                                                                                                                                                                                                       | N88                                                                  |
| Hypertension                                                          | 401-405                                                                                                                                                                                                                                   | K86-K87                                                              |
| Hypothyroidism                                                        | 240.9, 243, 244, 246.1, 246.8                                                                                                                                                                                                             | T86                                                                  |
| Inflammatory bowel disease                                            | 555, 556                                                                                                                                                                                                                                  | -                                                                    |
| Irritable bowel syndrome                                              | 564.1 (Exclude 153-154, 157, 183.0, 197.5, 198.6, 235.2, 239.0, 555-556, 571.2, 571.5, 577.1, 579)                                                                                                                                        | D93                                                                  |

Manuscript Title: *Booster vaccination with inactivated whole-virus or mRNA vaccines and COVID-19–related deaths among people with multimorbidity: a cohort study*

Journal: *Canadian Medical Association Journal*

Doi: <http://doi.org/10.1503/cmaj.221068>

|                                     |                                                                                                                                                                          |     |
|-------------------------------------|--------------------------------------------------------------------------------------------------------------------------------------------------------------------------|-----|
| Multiple sclerosis                  | 323, 340, 341.0, 341.9, 377.3                                                                                                                                            | N86 |
| Myocardial infarction               | 410                                                                                                                                                                      | K75 |
| Parkinson’s disease                 | 332                                                                                                                                                                      | N87 |
| Peptic ulcer disease                | 531.7, 531.9, 532.7, 532.9, 533.7, 533.9, 534.7, 534.9                                                                                                                   | D86 |
| Peripheral vascular disease         | 440.2                                                                                                                                                                    | K92 |
| Psoriasis                           | 696.1                                                                                                                                                                    | S91 |
| Rheumatoid arthritis                | 446.5, 710.0–710.4, 714.0–714.2, 714.8, 725                                                                                                                              | L88 |
| Schizophrenia                       | 295                                                                                                                                                                      | P72 |
| Severe constipation                 | 560.1, 560.30, 560.39, 560.9, 564.0, 569.83, 569.89 (Exclude 152-154, 158, 179-189, 197.5-197.6, 235.2, 239.0, 555-556, 568.0, 614.6, (560.9 if 789.01, 789.02, 789.06)) | D12 |
| Stroke or transient ischemic attack | 362.3, 430, 431, 433.x1, 434.x1, 435, 436                                                                                                                                | K90 |

---

Supplementary Table 2. British National Formulary codes for the operationalization of medication use

| Medications                     | British National Formulary code |
|---------------------------------|---------------------------------|
| Renin-angiotensin-system agents | 2.5.5                           |
| Beta blockers                   | 2.4                             |
| Calcium channel blockers        | 2.6.2                           |
| Diuretics                       | 2.2                             |
| Nitrates                        | 2.6.1                           |
| Lipid lowering agents           | 2.12                            |
| Insulins                        | 6.1.1                           |
| Antidiabetic drugs              | 6.1.2                           |
| Antiarrhythmic drugs            | 2.3.2                           |
| Oral anticoagulants             | 2.8.2                           |
| Antiplatelets                   | 2.9                             |
| Steroid                         | 6.3.2                           |
| Antidepressants                 | 4.3                             |
| Antiviral drugs                 | 5.3                             |
| Antibacterial drugs             | 5.1                             |
| Immunosuppressants              | 8.2                             |

0

Supplementary Table 3. Incidence rate ratio of COVID-19-related mortality between the booster-vaccinated and the two-dose vaccinated by vaccine type (BNT162b2 versus CoronaVac) among those aged 60 years or older

| Vaccination      | No.   | No. of COVID-19-related deaths/No. person-days | No. of events per one-million-person-days | Unweighted IRR (95% CI) <sup>a</sup> | Weighted IRR (95% CI) <sup>a,b</sup> |
|------------------|-------|------------------------------------------------|-------------------------------------------|--------------------------------------|--------------------------------------|
| <b>BNT162b2</b>  |       |                                                |                                           |                                      |                                      |
| Two-dose         | 19950 | 32/895134                                      | 35.7                                      | 1                                    | 1                                    |
| Booster          | 62233 | 5/2799540                                      | 1.8                                       | 0.05 (0.02-0.12)                     | 0.06 (0.02-0.16)                     |
| <b>CoronaVac</b> |       |                                                |                                           |                                      |                                      |
| Two-dose         | 22750 | 84/1186805                                     | 70.8                                      | 1                                    | 1                                    |
| Booster          | 76216 | 24/3997630                                     | 6.0                                       | 0.09 (0.05-0.13)                     | 0.07 (0.04-0.11)                     |

<sup>a</sup> IRR = incidence rate ratio; CI = confidence interval

<sup>b</sup> Propensity score-based inverse probability of treatment weighting was used to weight the sample according to age, sex, time from second dose to index (or pseudo index) date (days), each of the 30 conditions used to define multimorbidity, as well as a range of chronic medications within one year prior to the index (or pseudo index) date

Supplementary Table 4. Incidence rate ratio (95% CI) of COVID-19-related mortality associated with booster vaccination, age, and other covariates estimated from multivariable Poisson regression <sup>a</sup>

|                             | BNT162b2                              |                                    | CoronaVac                             |                                    |
|-----------------------------|---------------------------------------|------------------------------------|---------------------------------------|------------------------------------|
|                             | Without age modification <sup>b</sup> | With age modification <sup>b</sup> | Without age modification <sup>b</sup> | With age modification <sup>b</sup> |
| Booster vaccination         | 0.051 (0.019-0.133)                   | 0.029 (0-19.422)                   | 0.102 (0.063-0.164)                   | 0.203 (0.006-7.109)                |
| Age                         | 1.049 (1.016-1.083)                   | 1.048 (1.014-1.083)                | 1.102 (1.079-1.125)                   | 1.104 (1.079-1.129)                |
| Booster vaccination X Age   |                                       | <b>1.008 (0.924-1.099)</b>         |                                       | <b>0.991 (0.947-1.037)</b>         |
| Men (women as referent)     | 0.98 (0.477-2.013)                    | 0.98 (0.477-2.012)                 | 2.106 (1.35-3.286)                    | 2.102 (1.347-3.28)                 |
| Time since second dose      | 1.003 (0.998-1.009)                   | 1.003 (0.998-1.009)                | 1.004 (1.001-1.007)                   | 1.004 (1.001-1.007)                |
| Chronic conditions          |                                       |                                    |                                       |                                    |
| Alcohol misuse              | 1.691 (0.197-14.515)                  | 1.691 (0.197-14.526)               | 2.296 (0.66-7.99)                     | 2.316 (0.665-8.066)                |
| Asthma                      | 0 (0-Inf)                             | 0 (0-Inf)                          | 0.235 (0.032-1.716)                   | 0.234 (0.032-1.713)                |
| Cancer, lymphoma            | 1.26 (0.135-11.784)                   | 1.244 (0.132-11.697)               | 3.809 (1.046-13.862)                  | 3.856 (1.058-14.053)               |
| Cancer, metastatic          | 5.586 (1.702-18.331)                  | 5.574 (1.697-18.316)               | 2.844 (1.345-6.011)                   | 2.851 (1.349-6.026)                |
| Cancer, non-metastatic      | 2.368 (0.779-7.201)                   | 2.356 (0.773-7.183)                | 1.997 (1.032-3.864)                   | 2.006 (1.037-3.882)                |
| Chronic pain                | 1.689 (0.679-4.2)                     | 1.69 (0.68-4.201)                  | 1.061 (0.605-1.862)                   | 1.063 (0.606-1.867)                |
| Chronic pulmonary disease   | 2.395 (0.788-7.28)                    | 2.392 (0.787-7.268)                | 1.238 (0.664-2.305)                   | 1.243 (0.667-2.316)                |
| Chronic viral hepatitis B   | 1.284 (0.165-9.995)                   | 1.286 (0.165-10.004)               | 0.33 (0.045-2.419)                    | 0.329 (0.045-2.416)                |
| Cirrhosis                   | 1.228 (0.151-9.981)                   | 1.222 (0.15-9.941)                 | 3.155 (1.145-8.695)                   | 3.162 (1.147-8.716)                |
| Dementia                    | 2.234 (0.269-18.549)                  | 2.247 (0.271-18.66)                | 3.896 (1.99-7.627)                    | 3.884 (1.982-7.61)                 |
| Depression                  | 0.269 (0.031-2.299)                   | 0.271 (0.032-2.314)                | 0.364 (0.083-1.594)                   | 0.363 (0.083-1.591)                |
| Diabetes                    | 0.85 (0.311-2.324)                    | 0.85 (0.311-2.324)                 | 1.091 (0.623-1.913)                   | 1.092 (0.623-1.916)                |
| Hypertension                | 1.361 (0.581-3.184)                   | 1.358 (0.58-3.179)                 | 0.515 (0.317-0.838)                   | 0.513 (0.315-0.835)                |
| Hypothyroidism              | 0.739 (0.097-5.603)                   | 0.737 (0.097-5.593)                | 0.933 (0.291-2.991)                   | 0.939 (0.293-3.01)                 |
| Inflammatory bowel disease  | 0 (0-Inf)                             | 0 (0-Inf)                          | 0 (0-Inf)                             | 0 (0-Inf)                          |
| Irritable bowel syndrome    | 0 (0-Inf)                             | 0 (0-Inf)                          | 0 (0-Inf)                             | 0 (0-Inf)                          |
| Parkinson's disease         | 4.877 (0.981-24.246)                  | 4.896 (0.985-24.322)               | 2.317 (0.706-7.602)                   | 2.32 (0.707-7.613)                 |
| Peptic ulcer disease        | 0.935 (0.12-7.287)                    | 0.936 (0.12-7.291)                 | 1.213 (0.507-2.902)                   | 1.204 (0.503-2.886)                |
| Peripheral vascular disease | 0 (0-Inf)                             | 0 (0-Inf)                          | 2.275 (0.309-16.733)                  | 2.29 (0.311-16.85)                 |
| Psoriasis                   | 4.926 (0.631-38.451)                  | 4.92 (0.63-38.408)                 | 0 (0-Inf)                             | 0 (0-Inf)                          |
| Rheumatoid arthritis        | 0 (0-Inf)                             | 0 (0-Inf)                          | 3.939 (1.458-10.642)                  | 3.931 (1.454-10.626)               |
| Schizophrenia               | 0 (0-Inf)                             | 0 (0-Inf)                          | 3.056 (0.73-12.796)                   | 3.075 (0.734-12.876)               |
| Severe constipation         | 0.95 (0.397-2.276)                    | 0.952 (0.397-2.28)                 | 0.947 (0.58-1.544)                    | 0.944 (0.579-1.541)                |
| Atrial fibrillation         | 2.199 (0.703-6.878)                   | 2.2 (0.704-6.872)                  | 2.205 (1.178-4.126)                   | 2.21 (1.181-4.135)                 |
| Congestive heart failure    | 1.072 (0.369-3.112)                   | 1.068 (0.368-3.102)                | 1.221 (0.642-2.324)                   | 1.219 (0.64-2.319)                 |
| Chronic kidney disease      | 4.444 (2.101-9.402)                   | 4.432 (2.094-9.382)                | 1.843 (1.161-2.926)                   | 1.843 (1.16-2.927)                 |
| Epilepsy                    | 0 (0-Inf)                             | 0 (0-Inf)                          | 1.175 (0.161-8.595)                   | 1.179 (0.161-8.627)                |
| Multiple sclerosis          | 0 (0-Inf)                             | 0 (0-Inf)                          | 0 (0-Inf)                             | 0 (0-Inf)                          |
| Myocardial infarction       | 0 (0-Inf)                             | 0 (0-Inf)                          | 2.86 (1.224-6.68)                     | 2.852 (1.221-6.663)                |

|                                 |                      |                      |                     |                     |
|---------------------------------|----------------------|----------------------|---------------------|---------------------|
| Stroke or TIA                   | 1.277 (0.401-4.063)  | 1.273 (0.4-4.052)    | 1.85 (1.014-3.374)  | 1.856 (1.017-3.387) |
| Medication use in the past year |                      |                      |                     |                     |
| Renin-angiotensin-system agents | 0.561 (0.269-1.174)  | 0.562 (0.269-1.176)  | 0.705 (0.455-1.092) | 0.705 (0.455-1.092) |
| Beta blockers                   | 0.796 (0.372-1.702)  | 0.796 (0.372-1.701)  | 0.922 (0.587-1.448) | 0.924 (0.588-1.452) |
| Calcium channel blockers        | 0.548 (0.262-1.146)  | 0.549 (0.263-1.148)  | 1.301 (0.826-2.048) | 1.302 (0.827-2.05)  |
| Diuretics                       | 6.441 (2.964-13.999) | 6.434 (2.961-13.984) | 2.148 (1.363-3.384) | 2.146 (1.362-3.382) |
| Nitrates                        | 0.954 (0.321-2.835)  | 0.954 (0.321-2.833)  | 0.977 (0.522-1.826) | 0.981 (0.525-1.834) |
| Lipid lowering agents           | 1.094 (0.502-2.384)  | 1.094 (0.502-2.384)  | 0.904 (0.575-1.419) | 0.906 (0.576-1.423) |
| Insulins                        | 1.844 (0.739-4.597)  | 1.849 (0.742-4.609)  | 2.368 (1.331-4.213) | 2.37 (1.331-4.218)  |
| Antidiabetic drugs              | 1.325 (0.467-3.757)  | 1.322 (0.466-3.748)  | 0.886 (0.501-1.569) | 0.887 (0.501-1.571) |
| Antiarrhythmic drugs            | 1.178 (0.287-4.827)  | 1.172 (0.286-4.808)  | 1.793 (0.789-4.077) | 1.791 (0.788-4.075) |
| Oral anticoagulants             | 1.951 (0.631-6.034)  | 1.95 (0.631-6.025)   | 0.519 (0.232-1.163) | 0.52 (0.232-1.165)  |
| Antiplatelets                   | 1.46 (0.656-3.252)   | 1.461 (0.656-3.254)  | 0.919 (0.567-1.491) | 0.918 (0.566-1.488) |
| Steroids                        | 2.163 (0.925-5.059)  | 2.168 (0.926-5.073)  | 2.161 (1.239-3.771) | 2.167 (1.241-3.781) |
| Antidepressants                 | 3.178 (1.159-8.715)  | 3.162 (1.152-8.681)  | 1.333 (0.7-2.54)    | 1.329 (0.698-2.533) |
| Antiviral drugs                 | 1.936 (0.687-5.459)  | 1.94 (0.688-5.469)   | 1.422 (0.689-2.934) | 1.422 (0.689-2.934) |
| Antibacterial drugs             | 2.888 (1.298-6.427)  | 2.884 (1.296-6.42)   | 2.294 (1.478-3.561) | 2.289 (1.474-3.555) |
| Immunosuppressants              | 0.706 (0.073-6.868)  | 0.707 (0.073-6.857)  | 0.683 (0.139-3.344) | 0.678 (0.139-3.323) |

<sup>a</sup> IRR = incidence rate ratio; CI = confidence interval

<sup>b</sup> Age modification of booster vaccination's association with COVID-19-related mortality



Supplementary Table 5. Incidence rate ratio of COVID-19-related mortality between all four included vaccine groups

| Vaccination | No.   | No. of COVID-19-related deaths/No. person-days | No. of events per one-million-person-days | Unweighted IRR (95% CI) <sup>a</sup> | Weighted IRR (95% CI) <sup>a b</sup> |
|-------------|-------|------------------------------------------------|-------------------------------------------|--------------------------------------|--------------------------------------|
| CoronaVac   |       |                                                |                                           |                                      |                                      |
| Two-dose    | 32341 | 88/1657144                                     | 53.1                                      | 1                                    | 1                                    |
| Booster     | 94977 | 26/4931857                                     | 5.3                                       | 0.02 (0.01-0.05)                     | 0.03 (0.01-0.08)                     |
| BNT162b2    |       |                                                |                                           |                                      |                                      |
| Two-dose    | 33435 | 34/1454857                                     | 23.4                                      | 0.44 (0.29-0.65)                     | 0.49 (0.31-0.78)                     |
| Booster     | 87289 | 5/3860900                                      | 1.3                                       | 0.01 (0.06-0.15)                     | 0.07 (0.04-0.11)                     |

<sup>a</sup> IRR = incidence rate ratio; CI = confidence interval

<sup>b</sup> Propensity score-based inverse probability of treatment weighting was used to weight the sample according to age, sex, time from second dose to index (or pseudo index) date (days), each of the 30 conditions used to define multimorbidity, as well as a range of chronic medications within one year prior to the index (or pseudo index) date

Supplementary Table 6. Incidence rate ratio of COVID-19-related mortality between heterologous booster-vaccinated and two-dose vaccinated

| Vaccination            | No.   | No. of COVID-19-related deaths/No. person-days | No. of events per one-million-person-days | Unweighted IRR (95% CI) <sup>a</sup> | Weighted IRR (95% CI) <sup>a b</sup> |
|------------------------|-------|------------------------------------------------|-------------------------------------------|--------------------------------------|--------------------------------------|
| CoronaVac              |       |                                                |                                           |                                      |                                      |
| Two-dose               | 32299 | 100/1857170                                    | 53.8                                      | 1                                    | 1                                    |
| Booster with BNT162b2  | 27678 | 2/1649254                                      | 1.2                                       | 0.02 (0.00-0.07)                     | 0.02 (0.00-0.06)                     |
| BNT162b2               |       |                                                |                                           |                                      |                                      |
| Two-dose               | 32561 | 30/1179736                                     | 25.4                                      | 1                                    | 1                                    |
| Booster with CoronaVac | 943   | 0/33836                                        | 0                                         | -                                    | -                                    |

<sup>a</sup> IRR = incidence rate ratio; CI = confidence interval

<sup>b</sup> Propensity score-based inverse probability of treatment weighting was used to weight the sample according to age, sex, time from second dose to index (or pseudo index) date (days), each of the 30 conditions used to define multimorbidity, as well as a range of chronic medications within one year prior to the index (or pseudo index) date

Supplementary Table 7. Incidence rate ratio of SARS-CoV-2 infection between the booster-vaccinated and the two-dose vaccinated by vaccine type (BNT162b2 versus CoronaVac)

| Vaccination | No.   | No. of COVID-19 infections /No. person-days | No. of events per one-million-person-days | Unweighted IRR (95% CI) <sup>a</sup> | Weighted IRR (95% CI) <sup>a b</sup> |
|-------------|-------|---------------------------------------------|-------------------------------------------|--------------------------------------|--------------------------------------|
| BNT162b2    |       |                                             |                                           |                                      |                                      |
| Two-dose    | 33435 | 1792/1409050                                | 1271.8                                    | 1                                    | 1                                    |
| Booster     | 87289 | 1517/3825119                                | 396.6                                     | 0.31 (0.29-0.33)                     | 0.32 (0.30-0.34)                     |
| CoronaVac   |       |                                             |                                           |                                      |                                      |
| Two-dose    | 32341 | 2422/1595428                                | 1518.1                                    | 1                                    | 1                                    |
| Booster     | 94977 | 2344/4875440                                | 480.1                                     | 0.32 (0.30-0.34)                     | 0.31 (0.29-0.33)                     |

<sup>a</sup> IRR = incidence rate ratio; CI = confidence interval

<sup>b</sup> Propensity score-based inverse probability of treatment weighting was used to weight the sample according to age, sex, time from second dose to index (or pseudo index) date (days), each of the 30 conditions used to define multimorbidity, as well as a range of chronic medications within one year prior to the index (or pseudo index) date

Supplementary Table 8. Sensitivity analysis with main analysis repeated with each of the multimorbidity component chronic conditions removed (BNT162b2 cohort)

| Condition removed from analysis     | No. events (booster/two-dose) | n (booster/two-dose) | No. person-days (booster/two-dose) | Incidence rate (booster/two-dose) | Unweighted IRR (95% CI) <sup>a</sup> | Weighted IRR (95% CI) <sup>a,b</sup> |
|-------------------------------------|-------------------------------|----------------------|------------------------------------|-----------------------------------|--------------------------------------|--------------------------------------|
| Alcohol misuse                      | 5/34                          | 86714/33108          | 3835886/1440569                    | 0.1/2.4                           | 0.055 (0.019-0.129)                  | 0.053 (0.018-0.157)                  |
| Asthma                              | 5/34                          | 84979/32424          | 3754700/1413860                    | 0.1/2.4                           | 0.055 (0.019-0.129)                  | 0.053 (0.018-0.158)                  |
| Cancer, lymphoma                    | 5/34                          | 87128/33382          | 3853695/1452811                    | 0.1/2.3                           | 0.055 (0.019-0.129)                  | 0.052 (0.018-0.156)                  |
| Cancer, metastatic                  | 5/33                          | 86676/33174          | 3831949/1444970                    | 0.1/2.3                           | 0.057 (0.020-0.134)                  | 0.054 (0.018-0.162)                  |
| Cancer, non-metastatic              | 5/33                          | 85529/32747          | 3784102/1427242                    | 0.1/2.3                           | 0.057 (0.020-0.134)                  | 0.053 (0.018-0.156)                  |
| Chronic pain                        | 4/33                          | 82848/31397          | 3664110/1368462                    | 0.1/2.4                           | 0.045 (0.013-0.114)                  | 0.047 (0.014-0.158)                  |
| Chronic pulmonary disease           | 5/33                          | 86391/33087          | 3821506/1439467                    | 0.1/2.3                           | 0.057 (0.020-0.134)                  | 0.054 (0.018-0.161)                  |
| Chronic viral hepatitis B           | 5/34                          | 84117/32214          | 3719193/1401721                    | 0.1/2.4                           | 0.055 (0.019-0.129)                  | 0.053 (0.018-0.160)                  |
| Cirrhosis                           | 5/34                          | 87017/33333          | 3849475/1450089                    | 0.1/2.3                           | 0.055 (0.019-0.129)                  | 0.053 (0.018-0.158)                  |
| Dementia                            | 5/33                          | 87156/33389          | 3854167/1452471                    | 0.1/2.3                           | 0.057 (0.020-0.134)                  | 0.053 (0.018-0.160)                  |
| Depression                          | 4/34                          | 83777/31648          | 3706196/1383785                    | 0.1/2.5                           | 0.044 (0.013-0.110)                  | 0.046 (0.014-0.157)                  |
| Diabetes                            | 5/30                          | 47302/18218          | 2094424/782715                     | 0.2/3.8                           | 0.062 (0.021-0.147)                  | 0.062 (0.021-0.183)                  |
| Hypertension                        | 5/29                          | 32948/13138          | 1446981/558660                     | 0.3/5.2                           | 0.067 (0.023-0.158)                  | 0.059 (0.021-0.165)                  |
| Hypothyroidism                      | 5/34                          | 83850/31999          | 3709567/1396534                    | 0.1/2.4                           | 0.055 (0.019-0.129)                  | 0.053 (0.018-0.157)                  |
| Inflammatory bowel disease          | 5/34                          | 87112/33354          | 3852845/1451503                    | 0.1/2.3                           | 0.055 (0.019-0.129)                  | 0.053 (0.018-0.158)                  |
| Irritable bowel syndrome            | 5/34                          | 87026/33302          | 3848559/1449948                    | 0.1/2.3                           | 0.055 (0.019-0.129)                  | 0.053 (0.018-0.158)                  |
| Parkinson's disease                 | 5/32                          | 87094/33377          | 3852526/1451980                    | 0.1/2.2                           | 0.059 (0.020-0.138)                  | 0.056 (0.018-0.168)                  |
| Peptic ulcer disease                | 5/34                          | 86563/33151          | 3827340/1442138                    | 0.1/2.4                           | 0.055 (0.019-0.129)                  | 0.053 (0.018-0.159)                  |
| Peripheral vascular disease         | 5/34                          | 87157/33393          | 3854333/1453141                    | 0.1/2.3                           | 0.055 (0.019-0.129)                  | 0.053 (0.018-0.158)                  |
| Psoriasis                           | 5/34                          | 86977/33286          | 3847182/1448468                    | 0.1/2.3                           | 0.055 (0.019-0.129)                  | 0.053 (0.018-0.158)                  |
| Rheumatoid arthritis                | 5/34                          | 86637/33169          | 3833735/1444573                    | 0.1/2.4                           | 0.055 (0.019-0.129)                  | 0.052 (0.017-0.157)                  |
| Schizophrenia                       | 5/34                          | 86821/33177          | 3839574/1444933                    | 0.1/2.4                           | 0.055 (0.019-0.129)                  | 0.052 (0.018-0.157)                  |
| Severe constipation                 | 5/33                          | 81180/31292          | 3572990/1360978                    | 0.1/2.4                           | 0.058 (0.020-0.135)                  | 0.056 (0.018-0.173)                  |
| Atrial fibrillation                 | 4/33                          | 86020/32994          | 3805102/1436321                    | 0.1/2.3                           | 0.046 (0.014-0.115)                  | 0.048 (0.014-0.163)                  |
| Congestive heart failure            | 4/34                          | 86774/33229          | 3841367/1446737                    | 0.1/2.4                           | 0.044 (0.013-0.111)                  | 0.045 (0.013-0.151)                  |
| Chronic kidney disease              | 5/33                          | 84005/32104          | 3712744/1397690                    | 0.1/2.4                           | 0.057 (0.020-0.133)                  | 0.057 (0.018-0.175)                  |
| Epilepsy                            | 5/34                          | 87018/33284          | 3849893/1447965                    | 0.1/2.3                           | 0.055 (0.019-0.129)                  | 0.052 (0.018-0.157)                  |
| Multiple sclerosis                  | 5/34                          | 87227/33399          | 3858436/1453185                    | 0.1/2.3                           | 0.055 (0.019-0.129)                  | 0.052 (0.017-0.156)                  |
| Myocardial infarction               | 5/34                          | 86850/33223          | 3843918/1445792                    | 0.1/2.4                           | 0.055 (0.019-0.129)                  | 0.053 (0.018-0.158)                  |
| Stroke or transient ischemic attack | 5/33                          | 85169/32524          | 3770267/1414478                    | 0.1/2.3                           | 0.057 (0.019-0.133)                  | 0.050 (0.017-0.142)                  |

<sup>a</sup> IRR = incidence rate ratio; CI = confidence interval

<sup>b</sup> Propensity score-based inverse probability of treatment weighting was used to weight the sample according to age, sex, time from second dose to index (or pseudo index) date (days), each of the 30 conditions used to define multimorbidity, as well as a range of chronic medications within one year prior to the index (or pseudo index) date

Supplementary Table 9. Sensitivity analysis with main analysis repeated with each of the multimorbidity component chronic conditions removed (CoronaVac cohort)

| Condition removed from analysis     | No. events (booster/two-dose) | n (booster/two-dose) | No. person-days (booster/two-dose) | Incidence rate (booster/two-dose) | Unweighted IRR (95% CI) <sup>a</sup> | Weighted IRR (95% CI) <sup>a,b</sup> |
|-------------------------------------|-------------------------------|----------------------|------------------------------------|-----------------------------------|--------------------------------------|--------------------------------------|
| Alcohol misuse                      | 26/86                         | 94479/32109          | 4905985/1644784                    | 0.5/5.2                           | 0.101 (0.064-0.155)                  | 0.080 (0.050-0.127)                  |
| Asthma                              | 26/88                         | 93284/31739          | 4838003/1626073                    | 0.5/5.4                           | 0.099 (0.063-0.151)                  | 0.078 (0.049-0.124)                  |
| Cancer, lymphoma                    | 26/87                         | 94865/32301          | 4925955/1654835                    | 0.5/5.3                           | 0.100 (0.064-0.153)                  | 0.078 (0.049-0.124)                  |
| Cancer, metastatic                  | 26/83                         | 94565/32076          | 4911690/1643761                    | 0.5/5.0                           | 0.105 (0.066-0.160)                  | 0.081 (0.050-0.129)                  |
| Cancer, non-metastatic              | 25/83                         | 93481/31726          | 4856577/1627344                    | 0.5/5.1                           | 0.101 (0.063-0.155)                  | 0.076 (0.047-0.122)                  |
| Chronic pain                        | 26/84                         | 90631/30745          | 4700488/1579422                    | 0.6/5.3                           | 0.104 (0.066-0.159)                  | 0.081 (0.051-0.129)                  |
| Chronic pulmonary disease           | 24/83                         | 93738/31919          | 4865897/1634525                    | 0.5/5.1                           | 0.097 (0.060-0.150)                  | 0.077 (0.048-0.125)                  |
| Chronic viral hepatitis B           | 26/88                         | 91800/31182          | 4755655/1598177                    | 0.5/5.5                           | 0.099 (0.063-0.151)                  | 0.078 (0.049-0.124)                  |
| Cirrhosis                           | 24/86                         | 94744/32243          | 4919687/1652441                    | 0.5/5.2                           | 0.094 (0.058-0.145)                  | 0.074 (0.046-0.119)                  |
| Dementia                            | 26/83                         | 94789/32220          | 4924092/1651349                    | 0.5/5.0                           | 0.105 (0.066-0.161)                  | 0.078 (0.049-0.125)                  |
| Depression                          | 26/88                         | 92165/31253          | 4782829/1604950                    | 0.5/5.5                           | 0.099 (0.063-0.151)                  | 0.078 (0.049-0.123)                  |
| Diabetes                            | 19/80                         | 50434/17461          | 2594842/881557                     | 0.7/9.1                           | 0.081 (0.048-0.130)                  | 0.066 (0.039-0.112)                  |
| Hypertension                        | 18/74                         | 34690/12533          | 1757183/633636                     | 1.0/11.7                          | 0.088 (0.051-0.143)                  | 0.074 (0.043-0.126)                  |
| Hypothyroidism                      | 26/87                         | 91946/31227          | 4774374/1603283                    | 0.5/5.4                           | 0.100 (0.064-0.153)                  | 0.079 (0.050-0.126)                  |
| Inflammatory bowel disease          | 26/88                         | 94885/32309          | 4926333/1655254                    | 0.5/5.3                           | 0.099 (0.063-0.151)                  | 0.078 (0.049-0.124)                  |
| Irritable bowel syndrome            | 26/88                         | 94791/32278          | 4923227/1653444                    | 0.5/5.3                           | 0.099 (0.063-0.151)                  | 0.078 (0.049-0.124)                  |
| Parkinson's disease                 | 26/86                         | 94786/32272          | 4923270/1653272                    | 0.5/5.2                           | 0.102 (0.064-0.155)                  | 0.079 (0.049-0.125)                  |
| Peptic ulcer disease                | 25/87                         | 94137/32059          | 4886309/1641915                    | 0.5/5.3                           | 0.097 (0.061-0.148)                  | 0.075 (0.047-0.120)                  |
| Peripheral vascular disease         | 26/88                         | 94812/32300          | 4922944/1655343                    | 0.5/5.3                           | 0.099 (0.063-0.152)                  | 0.078 (0.049-0.124)                  |
| Psoriasis                           | 26/88                         | 94757/32265          | 4920033/1653284                    | 0.5/5.3                           | 0.099 (0.063-0.151)                  | 0.078 (0.049-0.124)                  |
| Rheumatoid arthritis                | 26/88                         | 94520/32174          | 4908466/1649107                    | 0.5/5.3                           | 0.099 (0.063-0.151)                  | 0.079 (0.049-0.125)                  |
| Schizophrenia                       | 25/88                         | 94536/32061          | 4911784/1642679                    | 0.5/5.4                           | 0.095 (0.060-0.146)                  | 0.073 (0.046-0.116)                  |
| Severe constipation                 | 24/82                         | 89011/30559          | 4597038/1566071                    | 0.5/5.2                           | 0.100 (0.062-0.155)                  | 0.079 (0.049-0.128)                  |
| Atrial fibrillation                 | 24/87                         | 93327/31845          | 4847615/1631784                    | 0.5/5.3                           | 0.093 (0.058-0.143)                  | 0.074 (0.046-0.119)                  |
| Congestive heart failure            | 24/86                         | 94417/32118          | 4905112/1645117                    | 0.5/5.2                           | 0.094 (0.058-0.145)                  | 0.072 (0.044-0.115)                  |
| Chronic kidney disease              | 23/87                         | 91594/31254          | 4750699/1600553                    | 0.5/5.4                           | 0.089 (0.055-0.138)                  | 0.069 (0.043-0.112)                  |
| Epilepsy                            | 26/88                         | 94807/32227          | 4924668/1651391                    | 0.5/5.3                           | 0.099 (0.063-0.151)                  | 0.078 (0.049-0.124)                  |
| Multiple sclerosis                  | 26/88                         | 94951/32334          | 4930326/1656887                    | 0.5/5.3                           | 0.099 (0.063-0.151)                  | 0.078 (0.049-0.124)                  |
| Myocardial infarction               | 26/87                         | 94531/32129          | 4911021/1646115                    | 0.5/5.3                           | 0.100 (0.063-0.153)                  | 0.078 (0.049-0.124)                  |
| Stroke or transient ischemic attack | 25/86                         | 92265/31294          | 4792902/1603501                    | 0.5/5.4                           | 0.097 (0.061-0.149)                  | 0.076 (0.048-0.122)                  |

<sup>a</sup> IRR = incidence rate ratio; CI = confidence interval

<sup>b</sup> Propensity score-based inverse probability of treatment weighting was used to weight the sample according to age, sex, time from second dose to index (or pseudo index) date (days), each of the 30 conditions used to define multimorbidity, as well as a range of chronic medications within one year prior to the index (or pseudo index) date

Supplementary Table 10. Incidence rate ratio of COVID-19-related mortality (COVID-19 positive within 7 or 14 days before death) between the booster-vaccinated and the two-dose vaccinated by vaccine type (BNT162b2 versus CoronaVac)

| Vaccination                                     | No.   | No. of COVID-19-related deaths/No. person-days | No. of events per one-million-person-days | Unweighted IRR (95% CI) <sup>a</sup> | Weighted IRR (95% CI) <sup>a,b</sup> |
|-------------------------------------------------|-------|------------------------------------------------|-------------------------------------------|--------------------------------------|--------------------------------------|
| <b>COVID-19 within 7 days before mortality</b>  |       |                                                |                                           |                                      |                                      |
| <b>BNT162b2</b>                                 |       |                                                |                                           |                                      |                                      |
| Two-dose                                        | 33435 | 22/1454857                                     | 15.1                                      | 1                                    | 1                                    |
| Booster                                         | 87289 | 5/3860900                                      | 1.3                                       | 0.09 (0.03-0.21)                     | 0.09 (0.03-0.30)                     |
| <b>CoronaVac</b>                                |       |                                                |                                           |                                      |                                      |
| Two-dose                                        | 32341 | 69/1657144                                     | 41.6                                      | 1                                    | 1                                    |
| Booster                                         | 94977 | 22/4931857                                     | 4.5                                       | 0.11 (0.07-0.17)                     | 0.09 (0.05-0.14)                     |
| <b>COVID-19 within 14 days before mortality</b> |       |                                                |                                           |                                      |                                      |
| <b>BNT162b2</b>                                 |       |                                                |                                           |                                      |                                      |
| Two-dose                                        | 33435 | 31/1454857                                     | 21.3                                      | 1                                    | 1                                    |
| Booster                                         | 87289 | 5/3860900                                      | 1.3                                       | 0.06 (0.02-0.14)                     | 0.06 (0.02-0.18)                     |
| <b>CoronaVac</b>                                |       |                                                |                                           |                                      |                                      |
| Two-dose                                        | 32341 | 83/1657144                                     | 50.1                                      | 1                                    | 1                                    |
| Booster                                         | 94977 | 24/4931857                                     | 4.9                                       | 0.10 (0.06-0.15)                     | 0.08 (0.05-0.13)                     |

<sup>a</sup> IRR = incidence rate ratio; CI = confidence interval

<sup>b</sup> Propensity score-based inverse probability of treatment weighting was used to weight the sample according to age, sex, time from second dose to index (or pseudo index) date (days), each of the 30 conditions used to define multimorbidity, as well as a range of chronic medications within one year prior to the index (or pseudo index) date

Supplementary Table 11. Incidence rate ratio of COVID-19-related mortality between the booster-vaccinated and the two-dose vaccinated by vaccine type (BNT162b2 versus CoronaVac) with index date set 14 days after booster vaccination

| Vaccination | No.   | No. of COVID-19-related deaths/No. person-days | No. of events per one-million-person-days | Unweighted IRR (95% CI) <sup>a</sup> | Weighted IRR (95% CI) <sup>a, b</sup> |
|-------------|-------|------------------------------------------------|-------------------------------------------|--------------------------------------|---------------------------------------|
| BNT162b2    |       |                                                |                                           |                                      |                                       |
| Two-dose    | 27057 | 21/1022032                                     | 20.5                                      | 1                                    | 1                                     |
| Booster     | 71181 | 4/2728630                                      | 1.5                                       | 0.07 (0.02-0.19)                     | 0.10 (0.03-0.39)                      |
| CoronaVac   |       |                                                |                                           |                                      |                                       |
| Two-dose    | 27236 | 63/1232739                                     | 51.1                                      | 1                                    | 1                                     |
| Booster     | 80293 | 22/3683044                                     | 6.0                                       | 0.12 (0.07-0.19)                     | 0.08 (0.05-0.14)                      |

<sup>a</sup> IRR = incidence rate ratio; CI = confidence interval

<sup>b</sup> Propensity score-based inverse probability of treatment weighting was used to weight the sample according to age, sex, time from second dose to index (or pseudo index) date (days), each of the 30 conditions used to define multimorbidity, as well as a range of chronic medications within one year prior to the index (or pseudo index) date

Supplementary Table 12. Adjusted hazard ratio of COVID-19-related mortality between the booster vaccinated and two-dose vaccinated considering the competing risk from non-COVID-19-related mortality (Fine-Gray model)

| Vaccination      | No.   | No. of COVID-19-related deaths/ No. of non-COVID-19-related deaths/No. person-days | No. of events per one-million-person-days | Unadjusted HR (95% CI) <sup>a</sup> | Adjusted HR (95% CI) <sup>a b</sup> |
|------------------|-------|------------------------------------------------------------------------------------|-------------------------------------------|-------------------------------------|-------------------------------------|
| <b>CoronaVac</b> |       |                                                                                    |                                           |                                     |                                     |
| Two-dose         | 33435 | 34/100/1454857                                                                     | 23.4                                      | 1                                   | 1                                   |
| Booster          | 87289 | 5/34/3860900                                                                       | 1.3                                       | 0.10 (0.06-0.15)                    | 0.10 (0.06-0.16)                    |
| <b>BNT162b2</b>  |       |                                                                                    |                                           |                                     |                                     |
| Two-dose         | 32341 | 88/153/1657144                                                                     | 53.1                                      | 1                                   | 1                                   |
| Booster          | 94977 | 26/54/4931857                                                                      | 5.3                                       | 0.06 (0.02-0.14)                    | 0.05 (0.02-0.14)                    |

<sup>a</sup> HR = hazard ratio; CI = confidence interval

<sup>b</sup> Multivariable adjustment was used in the Fine-Gray regression model to adjust for potential confounding from covariates including age, sex, time from second dose to index (or pseudo index) date (days), each of the 30 conditions used to define multimorbidity, as well as a range of chronic medications within one year prior to the index (or pseudo index) date



Supplementary Table 13. Incidence rate ratio of COVID-19-related mortality between the booster-vaccinated and the two-dose vaccinated by vaccine type (BNT162b2 versus CoronaVac) with those with a COVID-19 history before the second dose excluded

| Vaccination | No.   | No. of COVID-19-related deaths/No. person-days | No. of events per one-million-person-days | Unweighted IRR (95% CI) <sup>a</sup> | Weighted IRR (95% CI) <sup>a b</sup> |
|-------------|-------|------------------------------------------------|-------------------------------------------|--------------------------------------|--------------------------------------|
| BNT162b2    |       |                                                |                                           |                                      |                                      |
| Two-dose    | 33418 | 34/1454003                                     | 23.4                                      | 1                                    | 1                                    |
| Booster     | 87284 | 5/3860656                                      | 1.3                                       | 0.06 (0.02-0.13)                     | 0.05 (0.02-0.16)                     |
| CoronaVac   |       |                                                |                                           |                                      |                                      |
| Two-dose    | 32315 | 88/1655230                                     | 53.2                                      | 1                                    | 1                                    |
| Booster     | 94971 | 26/4931538                                     | 5.3                                       | 0.10 (0.06-0.15)                     | 0.08 (0.05-0.12)                     |

<sup>a</sup> IRR = incidence rate ratio; CI = confidence interval

<sup>b</sup> Propensity score-based inverse probability of treatment weighting was used to weight the sample according to age, sex, time from second dose to index (or pseudo index) date (days), each of the 30 conditions used to define multimorbidity, as well as a range of chronic medications within one year prior to the index (or pseudo index) date

Appendix I – Data sources

Routine healthcare records provided by the Hospital Authority of Hong Kong were linked with population-based vaccination records at the Department of Health to identify COVID-19 vaccine recipients with multimorbidity. Matching between electronic health records and vaccination records was based on the anonymized Hong Kong Identity Number or other personal identification document numbers, such as foreign passports numbers, conducted by the Hospital Authority and the Department of Health.

The Hospital Authority serves as the sole provider of public inpatient services and a major provider of outpatient services in Hong Kong, with a comprehensive electronic health record system for facilitation of clinical management. Each resident has a unique Identity Number which allowed the Hospital Authority to create a unique anonymized reference key for each patient to link attendances to all public healthcare facilities. The electronic health records include demographics, diagnoses, medication dispensing records, outpatient and primary care clinics, emergency room attendances, laboratory tests and hospitalization details. The data from Hospital Authority has frequently been used for high-quality pharmacovigilance studies to evaluate the safety of medicines and vaccines at population level.<sup>1-8</sup> Previous research showed high coding accuracy for various health outcomes in the electronic health record of the Hospital Authority based on the International Classification of Diseases, Ninth Revision.<sup>9-11</sup> Our database was updated to 31 March 2022.

## Appendix II - Analysis

### 1. Main analysis

Stratified by vaccine type (BNT162b2 versus CoronaVac), propensity score-based inverse-probability-of-treatment weighted Poisson regression was used to estimate the weighted incidence rate ratio (IRR) of mortality related to COVID-19 between those who received the booster dose and those who received only two doses.

Covariates for the weighting included age, sex, time from second dose to index (or pseudo index) date (days), each of the 30 conditions used to define multimorbidity, as well as a range of chronic medications within one year prior to the index (or pseudo index) date, namely, renin-angiotensin-system agents, beta blockers, calcium channel blockers, diuretics, nitrates, lipid lowering agents, insulins, antidiabetic drugs, antiarrhythmic drugs, oral anticoagulants, antiplatelets, steroids, antidepressants, antiviral drugs, antibacterial drugs, and immunosuppressants.

### 2. Subgroup and extended analyses

In a subgroup analysis, we only included those aged 60 years<sup>12, 13</sup> or older to assess potential differences between the older and middle-aged or younger adults. The potential interaction between booster vaccination and age (as a continuous variable) was tested in a multivariable Poisson regression including participants of all age ranges. To enable a cross-platform comparison, we used propensity score-based (multinomial logistic regression) inverse probability of treatment weighting for multiple treatments to generate IRRs for each group using the two-dose CoronaVac group as the referent (IRR = 1). In addition, we repeated the main analysis on those receiving heterologous booster vaccination, i.e., BNT162-BNT162b2-CoronaVac and CoronaVac-CoronaVac-BNT162b2 compared with the two-dose vaccinated. As an extended analysis, we further investigated the outcome of SARS-CoV-2 infection indicated by a positive polymerase chain reaction test result in a public healthcare facility, with the same methods in the main analysis.

### 3. Sensitivity analyses

As a sensitivity analysis, the main analyses were repeated using a leave-one-out approach, i.e., 30 times with each component disease removed from the list used to define multimorbidity to observe any changes in the incidence rate ratios. Another set of analyses with COVID-19-related mortality indicated by positive polymerase chain reaction test result within seven and 14 days before death rather than 28 days was conducted to test for robustness with the variation in the outcome definition. In addition, repeated analysis was conducted with index (and pseudo index) date being set 14 days following the booster vaccination date or the original pseudo index date for the comparison cohort as vaccination typically takes a couple of weeks to take effect.<sup>14</sup> Considering the potential impact of non-COVID-19-related mortality, we further conducted a Fine-Gray model to estimate adjusted hazard ratios between the booster vaccinated and two-dose vaccinated. Lastly, we repeated the analysis excluding those with a history of COVID-19 indicated by a positive polymerase chain reaction test result before the second dose.

## References

1. Lai FTT, Huang L, Chui CSL, et al. Multimorbidity and adverse events of special interest associated with Covid-19 vaccines in Hong Kong. *Nature Communications*. 2022/01/20 2022;13(1):411. doi:10.1038/s41467-022-28068-3
2. Lai FTT, Chua GT, Chan EWW, et al. Adverse events of special interest following the use of BNT162b2 in adolescents: a population-based retrospective cohort study. *Emerg Microbes Infect*. Dec 2022;11(1):885-893. doi:10.1080/22221751.2022.2050952
3. Lai FTT, Huang L, Peng K, et al. Post-Covid-19-vaccination adverse events and healthcare utilization among individuals with or without previous SARS-CoV-2 infection. *J Intern Med*. Jan 19 2022;doi:10.1111/joim.13453
4. Wan EYF, Chui CSL, Lai FTT, et al. Bell's palsy following vaccination with mRNA (BNT162b2) and inactivated (CoronaVac) SARS-CoV-2 vaccines: a case series and nested case-control study. *The Lancet Infectious Diseases*. 2022;22(1):64-72. doi:10.1016/S1473-3099(21)00451-5
5. Li X, Tong X, Yeung WWY, et al. Two-dose COVID-19 vaccination and possible arthritis flare among patients with rheumatoid arthritis in Hong Kong. *Annals of the Rheumatic Diseases*. 2022;81(4):564. doi:10.1136/annrheumdis-2021-221571
6. Li X, Tong X, Wong ICK, et al. Lack of inflammatory bowel disease flare-up following two-dose BNT162b2 vaccine: a population-based cohort study. *Gut*. 2022;gutjnl-2021-326860. doi:10.1136/gutjnl-2021-326860
7. Li X, Lai FTT, Chua GT, et al. Myocarditis Following COVID-19 BNT162b2 Vaccination Among Adolescents in Hong Kong. *JAMA Pediatrics*. 2022;doi:10.1001/jamapediatrics.2022.0101
8. Lai FTT, Li X, Peng K, et al. Carditis After COVID-19 Vaccination With a Messenger RNA Vaccine and an Inactivated Virus Vaccine. *Annals of Internal Medicine*. 2022/03/15 2022;175(3):362-370. doi:10.7326/M21-3700
9. Wong AYS, Root A, Douglas IJ, et al. Cardiovascular outcomes associated with use of clarithromycin: population based study. *BMJ*. 2016;352:h6926. doi:10.1136/bmj.h6926
10. Lau WCY, Chan EW, Cheung C-L, et al. Association Between Dabigatran vs Warfarin and Risk of Osteoporotic Fractures Among Patients With Nonvalvular Atrial Fibrillation. *JAMA*. 2017;317(11):1151-1158. doi:10.1001/jama.2017.1363
11. Chan EW, Lau WC, Leung WK, et al. Prevention of Dabigatran-Related Gastrointestinal Bleeding With Gastroprotective Agents: A Population-Based Study. *Gastroenterology*. Sep 2015;149(3):586-95.e3. doi:10.1053/j.gastro.2015.05.002
12. Cerqueira-Silva T, Oliveira Vda, Boaventura VS, et al. Influence of age on the effectiveness and duration of protection of Vaxzevria and CoronaVac vaccines: A population-based study. *The Lancet Regional Health – Americas*. 2022;6doi:10.1016/j.lana.2021.100154
13. Arregocés-Castillo L, Fernández-Niño J, Rojas-Botero M, et al. Effectiveness of COVID-19 vaccines in older adults in Colombia: a retrospective, population-based study of the ESPERANZA cohort. *The Lancet Healthy Longevity*. 2022/04/01/ 2022;3(4):e242-e252. doi:[https://doi.org/10.1016/S2666-7568\(22\)00035-6](https://doi.org/10.1016/S2666-7568(22)00035-6)
14. Barda N, Dagan N, Cohen C, et al. Effectiveness of a third dose of the BNT162b2 mRNA COVID-19 vaccine for preventing severe outcomes in Israel: an observational study. *The Lancet*. 2021/12/04/ 2021;398(10316):2093-2100. doi:[https://doi.org/10.1016/S0140-6736\(21\)02249-2](https://doi.org/10.1016/S0140-6736(21)02249-2)
